# Supplementary material
Source: PubMed Central journal article supplement (PMC10947557)
Supplement: NIHMS1968673-supplement-Supporting_Information.pdf [file NIHMS1968673-supplement-Supporting_Information.pdf]

1  
2  
3  
4  
5  
6  
7  
8  
9  
10  
11  
12  
13  
14  
15  
16

# Engineering of a TrpR-based Biosensor for Altered Dynamic Range and Ligand Preference

Xinyu Gong <sup>a, 1</sup>, Ruihua Zhang <sup>a, 1</sup>, Jian Wang <sup>a</sup>, Yajun Yan <sup>a, \*</sup>

<sup>a</sup> School of Chemical, Materials and Biomedical Engineering, College of Engineering, The  
University of Georgia, Athens, GA 30602, USA

<sup>1</sup> These authors contributed equally to the work.

\* Corresponding author:

Yajun Yan

302 East Campus Road, The University of Georgia, Athens, GA 30602, USA

E-mail: yajunyan@uga.edu

Telephone: +1-706-542-8293

17 **Supporting Information**

18 **Table S1** Plasmids and strains used in this study.

| <b>Plasmids</b>                  | <b>Description</b>                                                                 | <b>Source</b> |
|----------------------------------|------------------------------------------------------------------------------------|---------------|
| <b>pCS27</b>                     | PLlacO1, <i>P15A</i> ori, Kan <sup>R</sup>                                         | 1             |
| <b>pSA74</b>                     | PLlacO1, <i>pSC101</i> * ori, Cl <sup>R</sup>                                      | 2             |
| <b>pCP20</b>                     | Flippase, Amp <sup>R</sup> , and temperature-sensitive replicon                    | 3             |
| <b>pSA-pLlacO1-TrpRwt</b>        | pSA74 harboring wild type <i>trpR</i> from <i>E. coli</i>                          | This study    |
| <b>pSA-pLlacO1-TrpR1</b>         | pSA74 harboring <i>trpR1</i> from <i>trpR</i>                                      | This study    |
| <b>pCS-PtrpOwt-GFP</b>           | pCS27 harboring wild type PtrpO from <i>E. coli</i> driving <i>egfp</i> expression | This study    |
| <b>pCS-PtrpO1-GFP</b>            | pCS27 harboring PtrpO1 from <i>E. coli</i> driving <i>egfp</i> expression          | This study    |
| <b>pSA-pLlacO1-TrpR1_HindIII</b> | pSA-pLlacO1-TrpR1 with introduced HindIII site in TrpR1                            | This study    |
| <b>pSA-pLlacO1-TrpR1_I57E</b>    | pSA-pLlacO1-TrpR1_HindIII with I57E mutation at TrpR1                              | This study    |
| <b>pSA-pLlacO1-TrpR1_I57D</b>    | pSA-pLlacO1-TrpR1_HindIII with I57D mutation at TrpR1                              | This study    |
| <b>pSA-pLlacO1-TrpR1_I57W</b>    | pSA-pLlacO1-TrpR1_HindIII with I57W mutation at TrpR1                              | This study    |
| <b>pSA-pLlacO1-TrpR1_I57A</b>    | pSA-pLlacO1-TrpR1_HindIII with I57A mutation at TrpR1                              | This study    |

|                                    |                                                          |            |
|------------------------------------|----------------------------------------------------------|------------|
| <b>pSA-pLlacO1-<br/>TrpR1_I57V</b> | pSA-pLlacO1-TrpR1_HindIII with I57V mutation at<br>TrpR1 | This study |
| <b>pSA-pLlacO1-<br/>TrpR1_I57S</b> | pSA-pLlacO1-TrpR1_HindIII with I57S mutation at<br>TrpR1 | This study |
| <b>pSA-pLlacO1-<br/>TrpR1_I57K</b> | pSA-pLlacO1-TrpR1_HindIII with I57K mutation at<br>TrpR1 | This study |
| <b>pSA-pLlacO1-<br/>TrpR1_I57N</b> | pSA-pLlacO1-TrpR1_HindIII with I57N mutation at<br>TrpR1 | This study |
| <b>pSA-pLlacO1-<br/>TrpR1_I57T</b> | pSA-pLlacO1-TrpR1_HindIII with I57T mutation at<br>TrpR1 | This study |
| <b>pSA-pLlacO1-<br/>TrpR1_I57G</b> | pSA-pLlacO1-TrpR1_HindIII with I57G mutation at<br>TrpR1 | This study |
| <b>pSA-pLlacO1-<br/>TrpR1_V58K</b> | pSA-pLlacO1-TrpR1_HindIII with V58K mutation at<br>TrpR1 | This study |
| <b>pSA-pLlacO1-<br/>TrpR1_V58S</b> | pSA-pLlacO1-TrpR1_HindIII with V58S mutation at<br>TrpR1 | This study |
| <b>pSA-pLlacO1-<br/>TrpR1_V58D</b> | pSA-pLlacO1-TrpR1_HindIII with V58D mutation at<br>TrpR1 | This study |
| <b>pSA-pLlacO1-<br/>TrpR1_V58T</b> | pSA-pLlacO1-TrpR1_HindIII with V58T mutation at<br>TrpR1 | This study |
| <b>pSA-pLlacO1-<br/>TrpR1_V58N</b> | pSA-pLlacO1-TrpR1_HindIII with V58N mutation at<br>TrpR1 | This study |

|                                        |                                                                |            |
|----------------------------------------|----------------------------------------------------------------|------------|
| <b>pSA-pLlacO1-<br/>TrpR1_V58Q</b>     | pSA-pLlacO1-TrpR1_HindIII with V58Q mutation at<br>TrpR1       | This study |
| <b>pSA-pLlacO1-<br/>TrpR1_V58E</b>     | pSA-pLlacO1-TrpR1_HindIII with V58E mutation at<br>TrpR1       | This study |
| <b>pSA-pLlacO1-<br/>TrpR1_V58W</b>     | pSA-pLlacO1-TrpR1_HindIII with V58W mutation at<br>TrpR1       | This study |
| <b>pSA-pLlacO1-<br/>TrpR1_V58L</b>     | pSA-pLlacO1-TrpR1_HindIII with V58L mutation at<br>TrpR1       | This study |
| <b>pSA-pLlacO1-<br/>TrpR1_V58A</b>     | pSA-pLlacO1-TrpR1_HindIII with V58A mutation at<br>TrpR1       | This study |
| <b>pSA-pLlacO1-<br/>TrpR1_V58G</b>     | pSA-pLlacO1-TrpR1_HindIII with V58G mutation at<br>TrpR1       | This study |
| <b>pSA-pLlacO1-<br/>TrpR1_I57AV58E</b> | pSA-pLlacO1-TrpR1_HindIII with I57A V58E<br>mutations at TrpR1 | This study |
| <b>pSA-pLlacO1-<br/>TrpR1_I57TV58E</b> | pSA-pLlacO1-TrpR1_HindIII with I57T V58E<br>mutations at TrpR1 | This study |
| <b>pSA-pLlacO1-<br/>TrpR1_I57VV58E</b> | pSA-pLlacO1-TrpR1_HindIII with I57V V58E<br>mutations at TrpR1 | This study |
| <b>pSA-pLlacO1-<br/>TrpR1_I57AV58K</b> | pSA-pLlacO1-TrpR1_HindIII with I57A V58K<br>mutations at TrpR1 | This study |
| <b>pSA-pLlacO1-<br/>TrpR1_I57TV58K</b> | pSA-pLlacO1-TrpR1_HindIII with I57T V58K<br>mutations at TrpR1 | This study |

|                                        |                                                                                                       |               |
|----------------------------------------|-------------------------------------------------------------------------------------------------------|---------------|
| <b>pSA-pLlacO1-<br/>TrpR1_I57VV58K</b> | pSA-pLlacO1-TrpR1_HindIII with I57V V58K mutations at TrpR1                                           | This study    |
| <b>pCS-PtrpO1(A4C)-GFP</b>             | pCS-PtrpO1-GFP with A4C mutation at PtrpO1                                                            | This study    |
| <b>pCS-PtrpO1(A4G)-<br/>GFP</b>        | pCS-PtrpO1-GFP with A4G mutation at PtrpO1                                                            | This study    |
| <b>pCS-PtrpO1(A4T)-GFP</b>             | pCS-PtrpO1-GFP with A4T mutation at PtrpO1                                                            | This study    |
| <b>pCS-PtrpO1(G3A)-<br/>GFP</b>        | pCS-PtrpO1-GFP with G3A mutation at PtrpO1                                                            | This study    |
| <b>pCS-PtrpO1(G3C)-<br/>GFP</b>        | pCS-PtrpO1-GFP with G3C mutation at PtrpO1                                                            | This study    |
| <b>pCS-PtrpO1(G3T)-GFP</b>             | pCS-PtrpO1-GFP with G3T mutation at PtrpO1                                                            | This study    |
| <b>pCS-PtrpO1(T2A)-GFP</b>             | pCS-PtrpO1-GFP with T2A mutation at PtrpO1                                                            | This study    |
| <b>pCS-PtrpO1(T2C)-GFP</b>             | pCS-PtrpO1-GFP with T2C mutation at PtrpO1                                                            | This study    |
| <b>pCS-PtrpO1(T2G)-GFP</b>             | pCS-PtrpO1-GFP with T2C mutation at PtrpO1                                                            | This study    |
| <b>Strains</b>                         | <b>Description</b>                                                                                    | <b>Source</b> |
| <b><i>E. coli</i> XL1-Blue</b>         | <i>recA1 endA1 gyrA96 thi-1 hsdR17 supE44 relA1 lac</i><br>[F' <i>proAB lacIqZ ΔM15 Tn10 (tetR)</i> ] | Stratagene    |
| <b><i>E. coli</i> BW25113</b>          | <i>rrnBT14 Δlac ZWJ16 hsdR514 ΔaraBADAH33</i><br><i>ΔrhaBADLD78</i>                                   | CGSC          |
| <b>RZ1</b>                             | <i>E. coli</i> BW25113 <i>ΔtrpR ΔtnaA</i>                                                             | This study    |

19

20

21 **Table S2** Tryptophan content in different culture media

| <b>Culture Medium</b>    | <b>Tryptophan content (mg/L)</b> |
|--------------------------|----------------------------------|
| M9 + 0 g yeast extract   | 0                                |
| M9 + 0.5 g yeast extract | Not detectable                   |
| M9 + 5 g yeast extract   | 6.495                            |

22

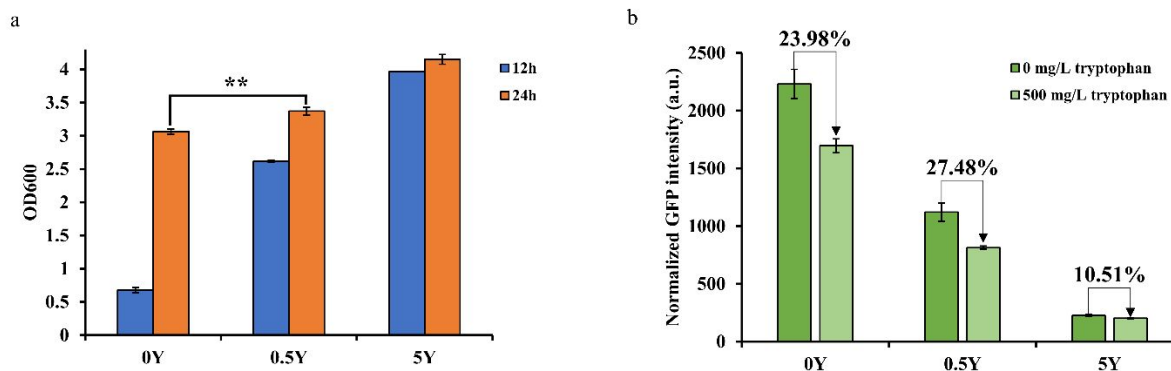

23

24 **Figure S1 The cell growth and biosensor performance of TrpR1-PtrpO1 in different culture**  
 25 **media.** (a) The cell growth (OD<sub>600</sub>) in different culture media with 500 mg/L tryptophan at 12h  
 26 and 24h. (b) The repression efficiency of TrpR1-PtrpO1 in different culture media at 24h. 0Y: pure  
 27 M9. 0.5Y: M9 with 0.5 g/L yeast extract. 5Y: M9 with 5 g/L yeast extract. \*\* P ≤ 0.01 (two-tailed  
 28 t-test; n = 3 independent biological replicates). All experimental data was collected from three  
 29 independent biological replicates (n=3). The standard deviations were present as error bars.

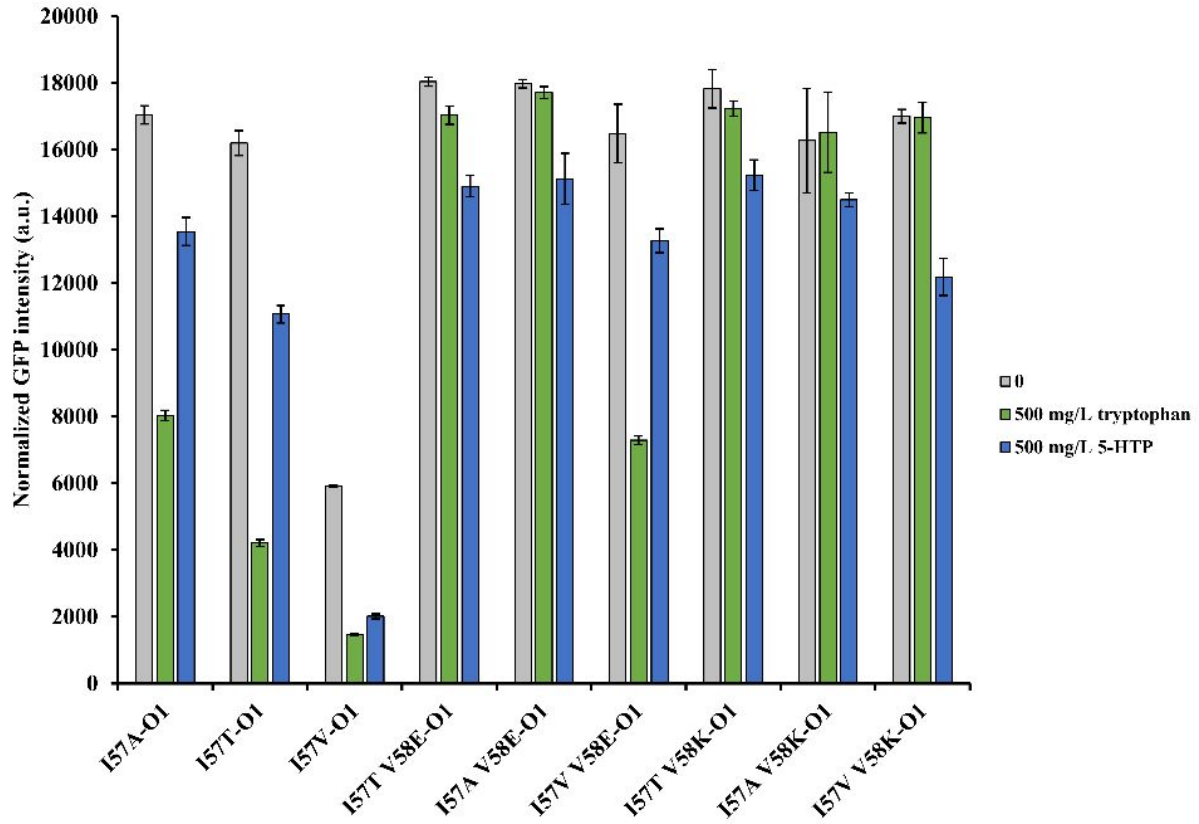

30  
 31 **Figure S2 The repression assay of TrpR1 double variants.** The variants were tested through  
 32 TrpR1-PtrpO1 biosensor system by comparing the fluorescence repression efficiency towards  
 33 tryptophan and 5-HTP. All experimental data was collected from three independent biological  
 34 replicates (n=3). The standard deviations were present as error bars.



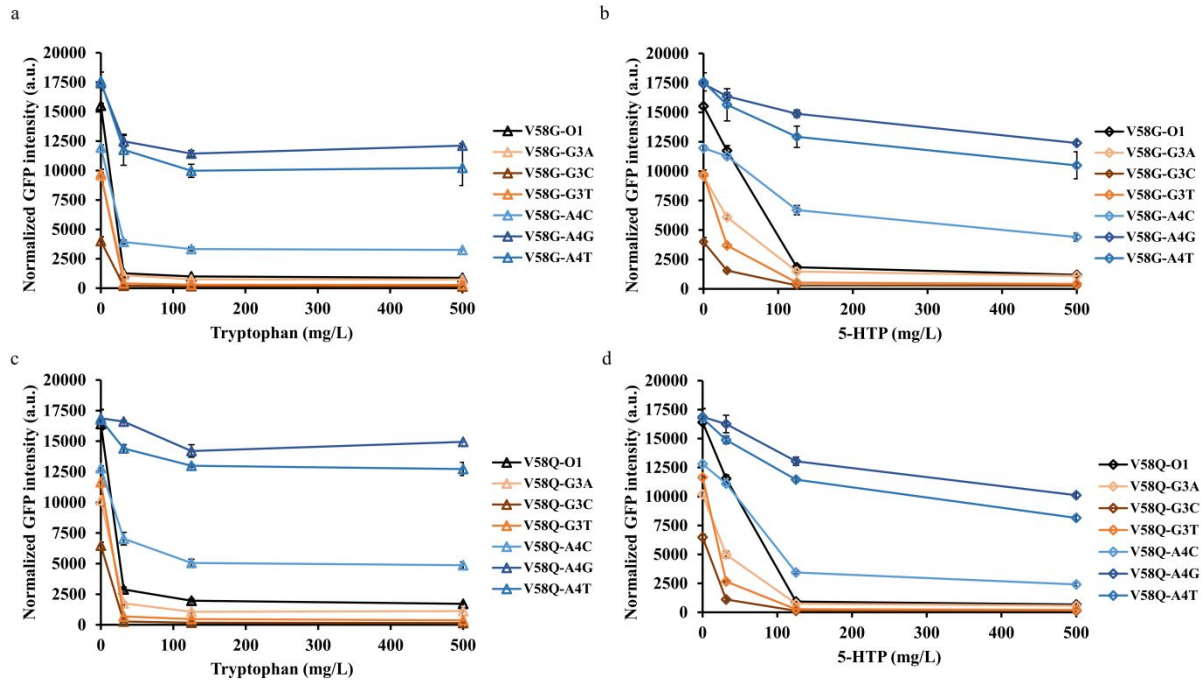

35  
 36 **Figure S3 The second round *trpO1* variants screening couple with TrpR1 variants V58G and**  
 37 **V58Q.** (a) The dynamic behavior of V58G coupled with *trpO1* variants to 0 to 500 mg/L  
 38 tryptophan. (b) The dynamic behavior of V58G coupled with *trpO1* variants to 0 to 500 mg/L 5-  
 39 HTP. (c) The dynamic behavior of V58Q coupled with *trpO1* variants to 0 to 500 mg/L tryptophan.  
 40 (d) The dynamic behavior of V58Q coupled with *trpO1* variants to 0 to 500 mg/L 5-HTP. All  
 41 experimental data was collected from three independent biological replicates (n=3). The standard  
 42 deviations were present as error bars.

43

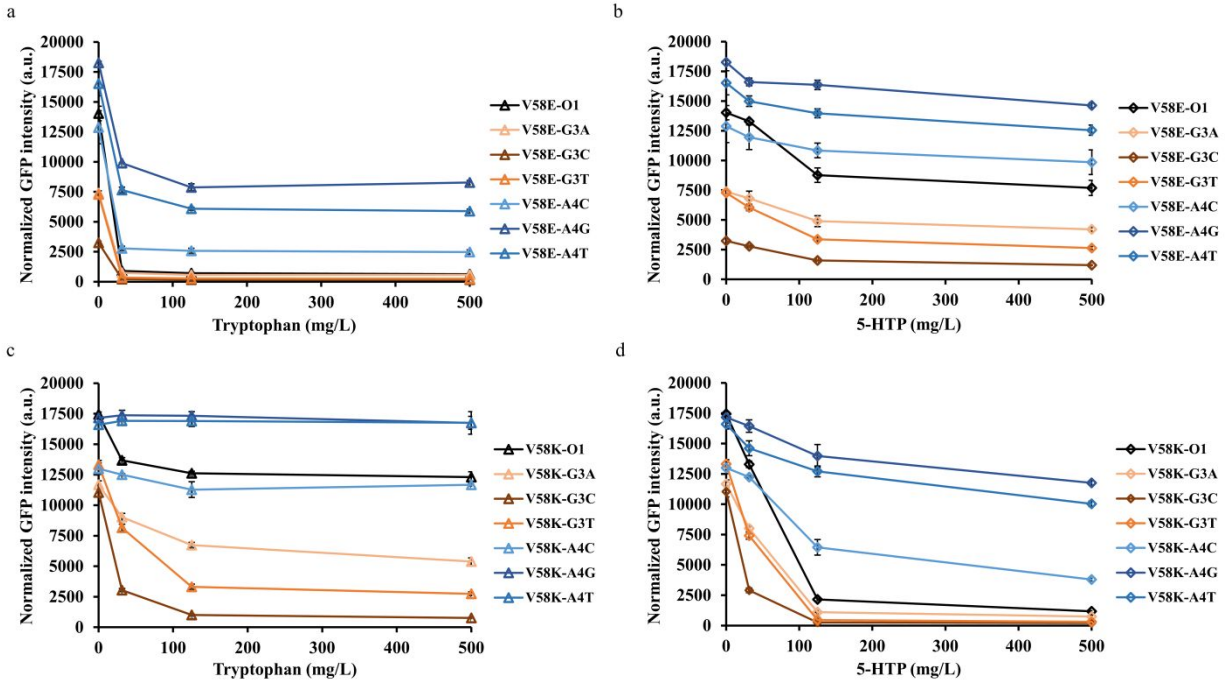

44  
 45 **Figure S4 The second round *trpO1* variants screening couple with TrpR1 variants V58E and**  
 46 **V58K.** (a) The dynamic behavior of V58E coupled with *trpO1* variants to 0 to 500 mg/L  
 47 tryptophan. (b) The dynamic behavior of V58E coupled with *trpO1* variants to 0 to 500 mg/L 5-  
 48 HTP. (c) The dynamic behavior of V58K coupled with *trpO1* variants to 0 to 500 mg/L tryptophan.  
 49 (d) The dynamic behavior of V58K coupled with *trpO1* variants to 0 to 500 mg/L 5-HTP. All  
 50 experimental data was collected from three independent biological replicates (n=3). The standard  
 51 deviations were present as error bars.

52

53 **References**

- 54 [1] Shen, C. R., and Liao, J. C. (2008) Metabolic engineering of Escherichia coli for 1-butanol and 1-  
55 propanol production via the keto-acid pathways, *Metab. Eng.* 10, 312-320.
- 56 [2] Huo, Y.-X., Cho, K. M., Rivera, J. G. L., Monte, E., Shen, C. R., Yan, Y., and Liao, J. C. (2011)  
57 Conversion of proteins into biofuels by engineering nitrogen flux, *Nat. Biotechnol.* 29, 346-351.
- 58 [3] Datsenko, K. A., and Wanner, B. L. (2000) One-step inactivation of chromosomal genes in  
59 Escherichia coli K-12 using PCR products, *Proc. Natl. Acad. Sci. U. S. A.* 97, 6640-6645.

60
